# Supplementary material for: Intraperitoneal delivery of a novel drug‐like compound improves disease severity in severe and intermediate mouse models of Spinal Muscular Atrophy
Source: PubMed Central journal article supplement (PMC6367425; doi:10.1038/s41598-018-38208-9), 2019-02-07
Supplement: 41598_2018_38208_MOESM1_ESM.pdf [file 41598_2018_38208_MOESM1_ESM.pdf]

**Intraperitoneal delivery of a novel drug-like compound improves disease severity  
in severe and intermediate mouse models of Spinal Muscular Atrophy**

Osman E.Y.<sup>1, ‡</sup>, Rietz A.<sup>2, ‡</sup>, Kline R. A.<sup>1</sup>, Cherry J.J.<sup>2</sup>, Hodgetts K.J.<sup>3</sup>, Lorson C.L.<sup>1\*</sup> and  
Androphy E.J.<sup>2\*</sup>

<sup>1</sup>Department of Veterinary Pathobiology, Bond Life Sciences Center, College of  
Veterinary Medicine, University of Missouri, Columbia, MO 65201, USA

<sup>2</sup> Department of Dermatology, Indiana University School of Medicine, Indianapolis, IN  
46202, USA

<sup>3</sup> Laboratory for Drug Discovery in Neurodegeneration, Brigham & Women's Hospital,  
Harvard Medical School, Cambridge, MA 02139, USA

\* Indicates co-corresponding authorship

## Supplementary Table 1A and B

| Structure                                                                         | Solubility (pH 7.4) | SMN2 EC50    | Mouse $\mu$ some $T_{1/2}$ | Human $\mu$ some $T_{1/2}$ | Plasma stability |
|-----------------------------------------------------------------------------------|---------------------|--------------|----------------------------|----------------------------|------------------|
| 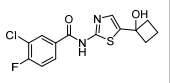 | 31 $\mu$ M          | 0.28 $\mu$ M | 39 min                     | >120 min                   | 326 min          |

| Dose (mg/kg) | Plasma $C_{max}$ (ng/mL) | Plasma AUC <sub>0-24h</sub> (ng.h/mL) | Plasma $T_{max}$ (h) | Plasma $T_{1/2}$ (h) | Brain $C_{max}$ (ng/mL) | Brain AUC <sub>0-24h</sub> (ng.h/mL) | Brain $T_{max}$ (h) | Brain $T_{1/2}$ (h) | B/P   |
|--------------|--------------------------|---------------------------------------|----------------------|----------------------|-------------------------|--------------------------------------|---------------------|---------------------|-------|
| 20 mpk IP    | 7660                     | 34291                                 | 0.5                  | 2.2                  | 13500                   | 51310                                | 0.5                 | 1.9                 | 1.5/1 |

### Supplementary Tables 1A and B LDN-2014 characteristics and pharmacokinetic properties

Tables are adapted from previously published data for compound LDN-2014 (compound 27, <sup>16</sup>). (A) General characteristics of LDN-2014. (B) Mouse pharmacokinetic properties of LDN-2014

## Supplementary Figure 1

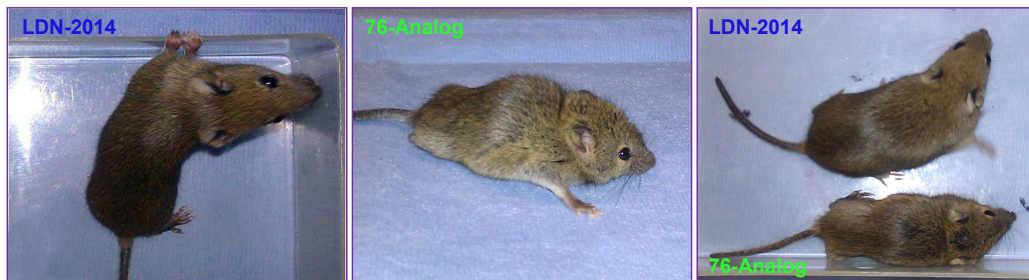

### Supplementary Figure 1 *In vivo* efficacy of LDN-2014 in *Smn*<sup>2B/-</sup> mice

LDN-2014 (5 mg/kg), 76-series analog (5 mg/kg) or vehicle (DMSO) injections were administered by IP every other day. Representative images of general appearance of LDN-2014 treated mice in comparison to mice treated with the 76-series analog at age of P60. Development of spinal deformity (kyphosis) can be clearly seen in animals treated with the 76-series analog.
